# Supplementary material for: Extensive somatic L1 retrotransposition in colorectal tumors
Source: HighWire-hosted journal article supplement (doi:10.1101/gr.145235.112), 2012-09-11
Supplement: Suppl_Table_4.xlsx [file Suppl_Table_4.xlsx]

## Sheet: Sheet1
Sample	Sex	Age	Treatment	Metastasis Documented	# of SomaticTumor Insertions	MSI	Clinical Pathology Notes
1	Female	60	N/A	N/A	5	Yes	60-year-old female with right colon cancer.
4	Male	66	Partial colectomy	N/A	3	No	66-year-old male with history of sigmoid colon cancer undergoes partial colectomy. Recurring colon cancer after treatment.
6	Male	43	N/A	N/A	2	Yes	43-year-old male with abdominal pain for two weeks and colonscopy showing mass in transverse colon with complete obstruction.
8	Female	38	Colectomy	N/A	0	No	38-year-old female with history of familial polyposis and mass of rectosigmoid junction undergoes total colectomy. Intraoperative gross consult: Multiple polyps in colon and rectum, tumor identified, polyp present at distal resection.
10	Female	76	Transverse colon resection	N/A	5	Yes	76-year-old female with transverse colon mass and multiple peritoneal nodules undergoes transverse colon resection.
12	Female	83	Radiation Therapy	N/A	9	Yes	83-year-old female with history of colon cancer, status post radiation therapy, breast cancer, large cell lymphoma, undergoes hysterectomy, bilateral salpingo-oophorectomy, and segmental bowel resection. She is not on estrogen supplementation. Recurring colon cancer after treatment.
14	Male	72	Radiotherapy, colectomy	N/A	0	No	72-year-old male with history of rectal cancer undergoes radiotherapy and colectomy. Recurring colon cancer after treatment.
15	Female	91	Colectomy	N/A	9	No	91-year-old female with adenocarcinoma of rectum undergoes excision. Gross intraoperative consultation: 6.7 cm tumor located 3.9 cm from resection margin.
1552	Male	58	Colectomy	N/A	2	Yes	58-year-old male with history of colon cancer with invasion into retroperitoneum. Recurring colon cancer after treatment.
1775	Female	80	Right emicolectomy	Yes (Liver)	17	Yes	80-year-old female with colon cancer and liver metastasis undergoes right hemicolectomy.
2853	Male	17	Total colectomy	N/A	4	No	17-year-old male with history of colon cancer undergoes total colectomy. Recurring colon cancer after treatment.
6645	Male	58	N/A	Yes (Liver)	3	No	58-year-old male with history of uveal melanoma, colorectal carcinoma with liver metastases, and multiple brown intramural small bowel nodules.
7647	Male	49	N/A	Yes (Liver)	0	No	49-year-old male with right colon cancer, metastatic to liver, and nodule found on small bowel.
8567	Male	41	N/A	Yes	1	Yes	41-year-old male with metastatic colon cancer.
17	Male	78	Colectomy, cholecystectomy	N/A	8	No	78-year-old male with a bowel obstruction undergoes colectomy and cholecystectomy.
20	Male	56	Ileum and colon excision	N/A	1	No	56-year-old male undergoes excision of ileum and colon.
