# Supplementary material for: Extensive somatic L1 retrotransposition in colorectal tumors
Source: HighWire-hosted journal article supplement (doi:10.1101/gr.145235.112), 2012-09-11
Supplement: SuppLegends.docx [file SuppLegends.docx]

**SUPPLEMENTARY FILES**

**Figures S1 and S2: Effect of peak size cutoffs on validation rate and number of insertions called for colon tumor/normal paired sample pool 1 (Fig. S1) or pool 2 (Fig. S2).**

A) Peak width and number of reads per peak (read count) versus number of known insertions meeting the corresponding cutoffs. In this case, “known insertions” refers to either insertions present in the reference genome assembly or those not present in the reference but presented in one or more studies. The green dot indicates the position of the low stringency cutoff (10 reads per peak, 100 bp width) and blue dot indicates the position of the high stringency cutoff (100 reads per peak, 100 bp width) on the surface. B) Peak width and read count cutoffs versus verification rate where verification rate is defined as the number of peaks corresponding to a known insertion site (reference or non-reference) at a given cutoff divided by the total number of peaks at the same cutoff. The green and blue dots are as indicated in (A).

**Figure S3: L1 insertions likely occur after tumor initiation**

A) SNP data showing heterozygosity in empty site alleles. Insertions 31, C2, and C4 are present in tumors 12, 2853, and 6645, respectively. Insertion numbers and SNP locations are noted above the chromatograms. Filled sites are shown from the original tumor section. Empty sites are shown from the original and a second tumor section, as well as from the paired normal colon. Note that only insertion C2 was present in the second tumor section, while insertions 31 and C4 were not. B) Insertions into the X chromosome of males still have empty sites, suggesting that they occur after the one-cell stage in the tumors. Insertion D9 occurred in tumor 17, while insertion D12 occurred in tumor 2853. Insertion E3 in tumor 2853 is not shown. C) Some insertions are present in a second section of the tumor, while others are absent. Insertions C2, D7, and E3 were present in two different portions of the same tumor, suggesting a relatively early event in tumorigenesis. Insertions 31, A10, C4, and D12 were present only in the first tumor section. Representative examples are shown. Abbreviations: F, filled site PCR; E, empty site PCR; TA, alternate section of the tumor sample. Filled site PCR bands are denoted by an arrow.

**Table S1 A and B: L1 seq data.**

Data on colo1 (Table A) and colo2 (Table B) tumor, normal, and germline (colon-specific) insertions. In Table A ‘Polymorphic insertions’ sheet lists 10 germline insertions that were used as controls (see Table S3). Columns are locations (chr. as well as hg18 and hg19 genomic coordinates), strand orientation, height (the number of reads in the peak), width (the position of the last base in the peak minus the position of the first), starts (the number of unique alignment positions in the peak), L1 family, pooled sample name, height and width of the peak from the second pool in the preceeding column (zero if the insertion only occurred in one pool), overlapping repeats, whether the L1 is present in another study, gene overlaps, exon overlaps (within 500 bp), and primer sequences. In some cases, alternative primers were used, whose sequences are available upon request. Selecting high stringency insertions (>= 100 bp width, >= 100 Height, family = L1Hs or noL1), there are 764 reference L1Hs insertion sites present in NCBI36/hg18 and 400 non-reference insertion sites (1164 altogether) in the colo1 data set. Likewise, 1249 high stringency insertions are found in the colo2 data set (816 reference and 433 non-reference ones).

**Table S2: RC-seq data**.

Sheet 1: RC-seq data from 5 tumor samples are presented and include L1, Alu, and SVA putative insertions. Four of these L1 insertions were detected by L1-seq (highlighted in yellow).

Sheet 2: High stringency RC-seq data showing putative insertions into genes. The L1 insertion into the *DGK1* gene was validated to be tumor-specific (in bold).

**Table S3:** **Results of the 3-step PCR validation process**

This table summarizes the results of the PCR validation steps. Columns are insertion code, chr. location in hg18 and 19, tumor sample that contained the insertion, success of PCR validation of the 3’ flank with the GoTaq mix using the L1 specific primer and the respective FS primer, success of Sanger sequencing of the 3’ flank, success of amplifying the complete insertion with the Gotaq or Expand enzyme mix using the respective FS and ES primers, success of PCR validation of the 5’ flank with the GoTaq mix using the L1nt112out and the respective ES primer, success of Sanger sequencing of the 5’ flank, success of delineating the TSD, notes.

Colo1 sheet: ins. 2-41: high stringency data; ins. 45-PCM1: low stringency data; poly1-poly10: polymorphic germline insertions. Polymorphic germline insertions occurred frequently even in those samples, where few or no somatic insertions were detected, indicating that the low number of insertions in some tumors is not due to low DNA quality, sample processing, or PCR validation failure. Colo2 sheet: ins. A1-E3: high stringency data. Only one insertion (“39”) proved to be present also in normal tissue, representing a low false positive rate of tumor-specificity. We also recovered two insertions that were predicted to occur both in the normal and tumor tissues, but PCR analysis indicated that they were present exclusively in the tumor (ins. 21 and 35). Two insertions that could not be validated (“10” and “23”) and first appeared to be tumor-specific turned out to be germline/colon-specific insertions after re-sequencing colo1/normal.

The 5 tumors that were sequenced by both L1-seq and RC-seq are tumor 1, 4, 6, 8, and 10. 11 high stringency L1Hs hits were found in these cancers by L1-seq, out of which 4 were detected by RC-seq as well (ins. 5, 9, 14, and 32). An L1 insertion in tumor 10 was detected by RC-seq, but was not present in the L1-seq data set (see Table S2).

Overall, the number of validated tumor-specific insertions is calculated in the following way: at the 3’ junctions we PCR-validated 26/40 and 37/51 insertions from the colo1 and colo2 high stringency data sets, respectively. Out of 16 colo1 insertions represented by low stringency Illumina reads, we were able to validate 9. Thus, we PCR-validated the 3’ flanks of 72 (26+37+9) of 107 (40+51+16) putative insertions. Altogether, out of 72 PCR-validated tumor-specific insertions, we could sequence either the 3’ or the 5’ junction in 69 cases (most cases were sequenced at the 3’ junction). For 35 insertions, we successfully sequenced both junctions, thus we could determine TSDs and putatitve endonuclease sites.

Abbreviations: nw, not working (unsuccessful PCR validation attempt); N/A, data not available; TSD, target site duplication.

**Table S4: Patient data.**

Age indicates the time of surgical sample removal. The number of tumor-specific insertions reflects those that were successfully sequenced. Abbreviations:MSI, microsatellite instability; N/A, data not available.

**Suppl. Text 1: Sanger sequencing results.**

hg18 chromosomal coordinates are provided for validated L1-seq insertions.
